# Supplementary material for: Identification of several high-risk HPV inhibitors and drug targets with a novel high-throughput screening assay
Source: PLoS Pathog. 2017 Feb 9;13(2):e1006168. doi: 10.1371/journal.ppat.1006168 (PMC5300127; doi:10.1371/journal.ppat.1006168)
Supplement: S1 Table — (XLSX) [file ppat.1006168.s010.xlsx]

## Sheet: Sheet1
Effect of the NSC compounds on cell cycle progression
Non-transfected U2OS cells
	G1		S		G2/M
	Average	STDEV	Average	STDEV	Average	STDEV
NSC 9782 60µM	42.1	1.13137	33.2	0.282843	22.7	0.707107
NSC 9782 40µM	44.9	1.27279	35.55	1.06066	16.1	0.848528
NSC 82269 80µM	46.3	0.424264	34.2	0.424264	18.05	0.494975
NSC 82269 40µM	48.2	2.54558	32.05	0.636396	17.35	1.3435
NSC 88915 120µM	35.85	0.494975	42.8	2.12132	20.6	2.82843
NSC 88915 80µM	47.5	0.282843	35.75	0.919239	14.15	2.19203
NSC 109128 20µM	39.5	0	38.65	0.0707107	19.65	0.636396
NSC 109128 10µM	46.1	3.11127	35.95	0.636396	16.85	1.20208
NSC 305831 20µM	39.9	0.565685	44.1	0.282843	14.6	0.565685
NSC 305831 10µM	45.85	0.212132	38.45	1.20208	14.85	0.494975
CPT 2nM	47.45	2.47487	35.95	3.74767	12.85	1.62635
CPT 2nM + NSC 9782 60µM	41.75	0.494975	34.2	0.565685	23.2	0.141421
CPT 2nM + NSC 9782 40µM	42.1	6.6468	37.4	2.26274	17.05	4.73762
CPT 2nM + NSC 82269 80µM	39.8	2.40416	37.25	2.05061	21.35	0.212132
CPT 2nM + NSC 82269 40µM	46.3	3.39411	33.3	0.989949	19.2	1.13137
ABT-888 40µM	40.9	3.9598	42.45	4.73762	14.45	1.76777
ABT-888 20µM	39.75	3.3234	41.4	2.12132	15.75	1.76777
DMSO	44.4	0.424264	36.9	1.13137	17.35	0.0707107
U2OS cells transfected with HPV18 genome
	G1		S		G2/M
	Average	STDEV	Average	STDEV	Average	STDEV
NSC 9782 60µM	35.75	2.33345	48.55	0.919239	13.85	4.03051
NSC 9782 40µM	32.25	1.90919	49.1	2.54558	16.5	2.26274
NSC 82269 80µM	36.5	3.25269	42.9	1.69706	18.4	2.54558
NSC 82269 40µM	35.25	0.212132	45.75	2.89914	16.4	0.848528
NSC 88915 120µM	32.8	0.707107	45.7	0.848528	18.35	0.212132
NSC 88915 80µM	29.25	1.76777	48.65	2.33345	18.85	0.353553
NSC 109128 20µM	32.95	2.6163	45.3	0.424264	21.05	1.20208
NSC 109128 10µM	31.7	2.12132	45.9	1.69706	19.55	1.62635
NSC 305831 20µM	29.25	1.06066	43.9	1.27279	21	0.848528
NSC 305831 10µM	34.65	6.15183	46.9	4.24264	15.65	2.75772
CPT 2nM	31.4	1.27279	49.6	1.83848	15.3	0
CPT 2nM + NSC 9782 60µM	37.45	2.47487	39.95	3.04056	19.2	1.27279
CPT 2nM + NSC 9782 40µM	37.9	1.55563	38.75	0.212132	19.8	0
CPT 2nM + NSC 82269 80µM	35.5	1.27279	41.2	3.53553	19.15	0.494975
CPT 2nM + NSC 82269 40µM	33.25	1.3435	45.7	1.83848	16	0.848528
ABT-888 40µM	31.15	2.6163	45.35	1.90919	19.7	0.565685
ABT-888 20µM	31.9	0.141421	45	1.9799	19.6	0
DMSO	34.85	0.636396	45.8	1.83848	15.9	1.41421
Average and standard deviation from two independent experiments
